# Supplementary material for: Mitigation mechanism of zinc oxide nanoparticles on cadmium toxicity in tomato
Source: Front Plant Sci. 2023 Mar 27;14:1162372. doi: 10.3389/fpls.2023.1162372 (PMC10083253; doi:10.3389/fpls.2023.1162372)
Supplement: Supplementary file 2 [file Table_1.xlsx]

## Sheet: Sheet1
	Table S1. The main accumulated metabolites in Tomato (Solanum lycopersicum cv. Micro-Tom) seedlings.
	compound name	CAS	FORMULA
	(-)-Cinchonidine	485-71-2	C19H22N2O
	(-)-Epiafzelechin	24808-04-6	C15H14O5
	(-)-Salsoline	89-31-6	C11H15NO2
	(+)-Afzelechin;(-)-Epiafzelechin	2545-00-8	C15H14O5
	(+)-Lyoniresinol 9'-O-glucoside	87585-32-8	C28H38O13
	(+)-Pteryxin	17944-23-9;13161-75-6	C21H22O7
	(10E,12Z)-(9S)-9-Hydroperoxyoctadeca-10,12-dienoic acid	29774-12-7	C18H32O4
	(13E)-11a-Hydroxy-9,15-dioxoprost-13-enoic acid	22973-19-9	C20H32O5
	(2S,3R,4E)-2-Amino-4-heptadecene-1,3-diol	6918-48-5	C17H35NO2
	(2S,5S)-trans-Carboxymethylproline		C7H11NO4
	(R)-Acetoin	513-86-0;53584-56-8	C4H8O2
	(R)-Menthofuran	494-90-6	C10H14O
	(S)-(-)-Perillyl alcohol	18457-55-1	C10H16O
	(S)-2-Acetolactate		C5H8O4
	(S)-2,3,4,5-tetrahydropyridine-2-carboxylate;D-1-Piperideine-2-carboxylic acid		C6H9NO2
	(S)-Actinidine	524-03-8	C10H13N
	1-(4-Hydroxyphenyl)propan-1-one	70-70-2	C9H10O2
	1-(alpha-Methyl-4-(2-methylpropyl)benzeneacetate)-beta-D-Glucopyranuronic acid	115075-59-7	C19H26O8
	1-Aminocyclopropanecarboxylic acid	22059-21-8	C4H7NO2
	1-Caffeoylquinic acid	1241-87-8	C16H18O9
	1-Isomangostin hydrate	26063-95-6	C24H28O7
	1-Methy-L-histidine	332-80-9	C7H11N3O2
	1-Methyladenine	5142-22-3	C6H7N5
	1-Naphthol	90-15-3	C10H8O
	1-Naphthylacetic acid	86-87-3	C12H10O2
	1-Octacosanol	557-61-9	C28H58O
	1,2-Dimethoxybenzene	91-16-7	C8H10O2
	1,2,4-Trimethylbenzene	95-63-6	C9H12
	1,2,5,6-Tetrahydro-4H-pyrrolo[3,2,1-ij]quinolin-4-one	57369-32-1	C11H11NO
	1,3,6-Trihydroxy-5-methoxyxanthone	41357-84-0	C14H10O6
	1,5-Anhydro-D-glucitol;trans-3-Hydroxycinnamic acid;p-Hydroxy-cinnamic acid	154-58-5;588-30-7;14755-02-3;501-98-4;7400-08-0	C6H12O5;C9H8O3
	1,5,6-Trihydroxyxanthone	5042-03-5	C13H8O5
	1,7-Diphenyl-4-hepten-3-one	79559-59-4	C19H20O
	1'-Acetoxychavicol acetate	52946-22-2	C13H14O4
	10-Gingerol	23513-15-7	C21H34O4
	11b-Hydroxyandrost-4-ene-3,17-dione	382-44-5	C19H26O3
	12-O-tetradecanoylphorbol-13-acetate	16561-29-8	C36H56O8
	12-OPDA	85551-10-6	C18H28O3
	12,13-DHOME		C18H34O4
	12(13)-EpOME		C18H32O3
	13-HPODE;13-L-Hydroperoxylinoleic acid	33964-75-9	C18H32O4
	13(S)-HPOT	67597-26-6	C18H30O4
	16(R)-HETE	183509-22-0	C20H32O3
	17-Hydroxyprogesterone	3168-01-2;68-96-2	C21H30O3
	1H-Indole-2,3-dione	91-56-5	C8H5NO2
	2-(2-Hydroxy-2-propyl)-5-methyl-5-vinyltetrahydrofuran	60047-17-8	C10H18O2
	2-(Methylamino)benzoic acid	119-68-6	C8H9NO2
	2-Benzal-4-hydroxyacetophenone	2657-25-2	C15H12O2
	2-Biphenylol	90-43-7	C12H10O
	2-Hydroxy-3-(4-hydroxyphenyl)propenoic acid		C9H8O4
	2-Hydroxy-3-carboxybenzalpyruvate	162794-83-4	C11H8O6
	2-Hydroxy-3-methylbenzalpyruvate		C11H10O4
	2-Hydroxy-6-oxo-6-(2-carboxyphenyl)-hexa-2,4-dienoate		C13H10O6
	2-Hydroxybutanoic acid	3347-90-8	C4H8O3
	2-Hydroxycinnamic acid	583-17-5;614-60-8	C9H8O3
	2-Hydroxyethanesulfonate	107-36-8	C2H6O4S
	2-Hydroxypyridine	142-08-5	C5H5NO
	2-Hydroxyxanthone	1915-98-6	C13H8O3
	2-Isopropyl-3-oxosuccinate		C7H10O5
	2-Keto-6-acetamidocaproate		C8H13NO4
	2-Phenylacetamide	103-81-1	C8H9NO
	2-Picolinic acid	14639-25-9;98-98-6	C6H5NO2
	2,3-Dihydro-2-phenyl-4H-benzopyran-4-one	487-26-3	C15H12O2
	2,4-Dimethylphenol	105-67-9	C8H10O
	2,5-Dihydroxybenzaldehyde	1194-98-5	C7H6O3
	2,6-Dimethyl-7-octene-2,3,6-triol	73815-21-1	C10H20O3
	2'-Deoxyinosine-5'-monophosphate	3393-18-8	C10H13N4O7P
	2'-Deoxyuridine;Deoxyuridine	951-78-0	C9H12N2O5
	2'-Hydroxygenistein	1156-78-1	C15H10O6
	2'-O-Methyladenosine	2140-79-6	C11H15N5O4
	2',3,5,7-Tetrahydroxyflavone	480-15-9	C15H10O6
	20-HETE	79551-86-3	C20H32O3
	20(S)-Ginsenoside Rh2	78214-33-2	C36H62O8
	22-Dehydroclerosterol	26315-07-1	C29H46O
	3-(2,3-Dihydroxyphenyl)propanoate		C9H10O4
	3-(3,4-Dihydroxy-5-methoxy)-2-propenoic acid	2041-35-2	C10H10O5
	3-(4-Hydroxyphenyl)-1-propanol	10210-17-0	C9H12O2
	3-(Carboxymethylamino)propanoic acid	505-72-6	C5H9NO4
	3-Aminoisobutanoic acid	144-90-1	C4H9NO2
	3-Dehydroquinate	10534-44-8	C7H10O6
	3-Dehydrosphinganine	16105-69-4	C18H37NO2
	3-Ethoxy-4-hydroxybenzaldehyde;Ethyl salicylate	121-32-4;118-61-6	C9H10O3
	3-Ethyl-1,2-benzenediol	933-99-3	C8H10O2
	3-Galloylquinic acid	17365-11-6	C14H16O10
	Isoferulic acid	537-73-5	C10H10O4
	3-Hydroxybenzoic acid	99-06-9	C7H6O3
	3-Hydroxyphenylacetic acid	621-37-4	C8H8O3
	3-Hydroxypicolinic acid	874-24-8	C6H5NO3
	3-Indolebutyric acid	133-32-4	C12H13NO2
	3-Isomangostin hydrate	26063-96-7	C24H28O7
	3-Isopropylmalate	921-28-8	C7H12O5
	3-Methoxy-4-hydroxyphenylglycolaldehyde	17592-23-3	C9H10O4
	3-Methoxy-4,5-methylenedioxycinnamaldehyde	74683-19-5	C11H10O4
	3-Methy-L-histidine	368-16-1	C7H11N3O2
	3-Methyl-2-oxovaleric acid	1460-34-0	C6H10O3
	3-Methylindole	83-34-1	C9H9N
	3-Methylsalicylaldehyde	824-42-0	C8H8O2
	3-Nitro-L-tyrosine	621-44-3	C9H10N2O5
	3-O-Acetyl-11-keto-beta-boswellic acid	67416-61-9	C32H48O5
	3-Oxoadipic acid	689-31-6	C6H8O5
	3,4-Dihydrocoumarin	119-84-6	C9H8O2
	3,4-Dihydroxybenzaldehyde;Protocatechuic aldehyde; 3,4-Dihydroxybenzaldehyde	139-85-5	C7H6O3
	3,4,5-Trimethoxycinnamyl alcohol	30273-62-2	C12H16O4
	3,8'-Biapigenin	101140-06-1	C30H18O10
	3,9-Dihydroxypterocarpan	61135-91-9	C15H12O4
	3',4',7-Trihydroxyisoflavone	485-63-2	C15H10O5
	3alpha,6beta-Ditigloyloxytropan-7beta-ol	7159-86-6	C18H27NO5
	4-Aminobutyric acid	56-12-2	C4H9NO2
	4-Hydroxy-3-methoxymandelate;Vanillylmandelic acid	55-10-7	C9H10O5
	4-Hydroxybenzaldehyde	123-08-0	C7H6O2
	4-Hydroxybutanoic acid	591-81-1	C4H8O3
	4-Hydroxyphenyl-2-propionic acid		C9H10O3
	4-Hydroxyphenylacetaldehyde;4'-Hydroxyacetophenone	7339-87-9;99-93-4	C8H8O2
	4-Hydroxyphenylacetylglutamic acid		C13H15NO6
	4-Isopropylbenzaldehyde	122-03-2	C10H12O
	4-Isopropylbenzoic acid	536-66-3	C10H12O2
	4-Methoxycinnamaldehyde	1963-36-6	C10H10O2
	4-Methyl-5-thiazoleethanol	137-00-8	C6H9NOS
	4-Methylumbelliferone	90-33-5	C10H8O3
	4-Methylumbelliferyl acetate	2747-05-9	C12H10O4
	4-Nitrocatechol	3316-09-4	C6H5NO4
	4-O-alpha-D-Galactopyranuronosyl-D-galacturonic acid	5894-59-7	C12H18O13
	4-Sulfobenzoate	636-78-2	C7H6O5S
	4'-Demethylpodophyllotoxin	40505-27-9	C21H20O8
	4'-Methoxyflavone	4143-74-2	C16H12O3
	4'-Prenyloxyresveratrol	69065-16-3	C19H20O4
	4',5,6,7-Tetramethoxyflavone;5,6,7-trimethoxy-2-(4-methoxyphenyl)chromen-4-one	1168-42-9	C19H18O6
	4',5,7-Trimethoxyflavone	6938-19-8	C18H16O6
	4',7-Dihydroxyflavone	2196-14-7	C15H10O4
	4',7-Isoflavandiol	531-95-3	C15H14O3
	5-(3-Pyridyl)-2-hydroxytetrahydrofuran	53798-73-5	C9H11NO2
	5-Aminolevulinate	106-60-5	C5H9NO3
	5-Aminovaleric acid	660-88-8	C5H11NO2
	5-Carboxyvanillic acid	2134-91-0	C9H8O6
	5-Heneicosylresorcinol	70110-59-7	C27H48O2
	5-Hydroxyconiferaldehyde	249647-14-1	C10H10O4
	5-Hydroxymethylfurfural	67-47-0	C6H6O3
	5-Methyl-2-furaldehyde	620-02-0	C6H6O2
	5-Methyldeoxycytidine	838-07-3	C10H15N3O4
	5-O-Caffeoylshikimic acid	73263-62-4	C16H16O8
	5-oxoproline	98-79-3	C5H7NO3
	5-Phenyl-1,3-oxazinane-2,4-dione		C10H9NO3
	5-Tricosyl-1,3-benzenediol	70110-60-0	C29H52O2
	5,6-DHET	213382-49-1	C20H34O4
	5,6-Dihydroxyindole	3131-52-0	C8H7NO2
	5,7-Dihydroxyisoflavone	61-68-7	C15H15NO2
	5'-Deoxyadenosine	4754-39-6	C10H13N5O3
	5'-S-Methyl-5'-thioadenosine	2457-80-9	C11H15N5O3S
	5(S)-HPETE	70968-82-0	C20H32O4
	6-Aminocaproic acid	60-32-2	C6H13NO2
	6-Deoxyjacareubin	16265-56-8	C18H14O5
	6-Gingerol; 6-Gingerol;[6]-Gingerol;Gingerol	58253-27-3;23513-14-6	C17H26O4
	6-Hydroxykaempferol	4324-55-4	C15H10O7
	6-hydroxynicotinic acid	5006-66-6	C6H5NO3
	6-Methoxymellein	13410-15-6	C11H12O4
	6,7-Dehydroferruginol	34539-84-9	C20H28O
	6,8-Diprenylnaringenin	68236-11-3	C25H28O5
	6''-O-Acetylglycitin	134859-96-4	C24H24O11
	6(1H)-Azulenone, 2,3-dihydro-1,4-dimethyl	71305-89-0	C12H14O
	7-(4-Hydroxyphenyl)-1-phenyl-4-hepten-3-one	100667-52-5	C19H20O2
	7-Ethoxycoumarin	31005-02-4	C11H10O3
	7-Hydroxyflavone	6665-86-7	C15H10O3
	7-Methylguanine	578-76-7	C6H7N5O
	7-Oxo-beta-sitosterol;6beta-Hydroxystigmast-4-en-3-one	2034-74-4;36450-02-9	C29H48O2
	7,8-Dihydroxyflavone	38183-03-8	C15H10O4
	7beta-(3-Ethyl-cis-crotonoyloxy)-1alpha-(2-methylbutyryloxy)-3,14-dehydro-Z-notonipetranone	80514-14-3	C26H38O5
	8-Amino-7-oxononanoic acid	4707-58-8	C9H17NO3
	8-Azabicyclo-3.2.1-octan-3-ol	501-33-7	C7H13NO
	8-Geranyloxypsoralen	7437-55-0	C21H22O4
	8-Hydroxybergapten	1603-47-0	C12H8O5
	8-Methylnonenoate	59320-77-3	C10H18O2
	8,9-DiHETrE	192461-96-4	C20H34O4
	8(R)-HPETE		C20H32O4
	9-Hydroxycalabaxanthone	35349-68-9	C24H24O6
	9-OxoODE	54232-59-6	C18H30O3
	9-Riburonosyladenine		C10H11N5O5
	9,10-DHOME	263399-34-4	C18H34O4
	Abrine	526-31-8	C12H14N2O2
	Absinthiin	1362-42-1	C30H40O6
	Abyssinone V	77263-11-7	C25H28O5
	Acetamide	60-35-5	C2H5NO
	Acetovanillone	498-02-2	C9H10O3
	Acetylcholine chloride	60-31-1	C7H16ClNO2
	Adenine	73-24-5	C5H5N5
	Adenosine	58-61-7	C10H13N5O4
	Adenosine 2',3'-cyclic phosphate	634-01-5	C10H12N5O6P
	Adenosine 3'-monophosphate	84-21-9	C10H14N5O7P
	Adenosine 5'-monophosphate	61-19-8	C10H14N5O7P
	Adrenosterone	382-45-6	C19H24O3
	Agnuside	11027-63-7	C22H26O11
	Agrocybenine	178764-92-6	C12H18N2O
	AICAR	3031-94-5	C9H15N4O8P
	Ajmaline	4360-12-7	C20H26N2O2
	Alantolactone	546-43-0	C15H20O2
	Alliin	556-27-4	C6H11NO3S
	Alloimperatorin	642-05-7	C16H14O4
	Allopregnanolone	516-54-1	C21H34O2
	alpha-Cyperol;Alismol;Spathulenol	20084-99-5;87827-55-2;6750-60-3	C15H24O
	alpha-Cyperone	473-08-5	C15H22O
	alpha-D-Glucose;D-Tagatose	492-62-6;87-81-0	C6H12O6
	alpha-Irone	79-69-6;35124-13-1	C14H22O
	alpha-Mangostin	6147-11-1	C24H26O6
	alpha-Spinasterol	481-18-5	C29H48O
	Alpha-Toxicarol	82-09-7	C23H22O7
	alpha-Zearalenol;beta-Zearalenol	36455-72-8;71030-11-0	C18H24O5
	Altechromone A	38412-47-4	C11H10O3
	Amabiline;Supinine	17958-43-9;551-58-6	C15H25NO4
	Aminomalonic acid	1068-84-4	C3H5NO4
	Anacrotine	5096-49-1	C18H25NO6
	Androstanediol	25126-76-5	C19H32O2
	Angelicin	523-50-2	C11H6O3
	Anthranilic acid	118-92-3	C7H7NO2
	Anthraquinone	84-65-1	C14H8O2
	Antirhine	16049-28-8	C19H24N2O
	Anwulignan	107534-93-0	C20H24O4
	Apigenin	520-36-5	C15H10O5
	Arachidonic acid	506-32-1	C20H32O2
	Arctiin	20362-31-6	C27H34O11
	Aristolindiquinone	86533-36-0	C12H10O4
	Artemisinin	63968-64-9	C15H22O5
	Ascorbic acid	50-81-7	C6H8O6
	Asp-Phe methyl ester;Aspartame	22839-47-0	C14H18N2O5
	Astaxanthin	7542-45-2;472-61-7	C40H52O4
	Astragalin	480-10-4	C21H20O11
	Astrocasine	2114-92-3	C20H26N2O
	Atropaldehyde		C9H8O
	Aurantio-obtusin	67979-25-3	C17H14O7
	Auriculine	22595-00-2	C31H45NO8
	Baicalein	491-67-8	C15H10O5
	Baicalin	21967-41-9	C21H18O11
	Bakkenolide A	19906-72-0	C15H22O2
	Baldrinal	18234-46-3	C12H10O4
	Bellidifolin	2798-25-6	C14H10O6
	Benzaldehyde	100-52-7	C7H6O
	Benzocaine	94-09-7	C9H11NO2
	Benzoin	119-53-9	C14H12O2
	Benzoyl glucuronide (Benzoic acid);2-Phenylethanol glucuronide	19237-53-7	C13H14O8;C14H18O7
	Benzoylagmatine		C12H18N4O
	Benzyl acetate	140-11-4	C9H10O2
	Benzyl cinnamate	103-41-3	C16H14O2
	Bergamotine	7380-40-7	C21H22O4
	Bergapten	484-20-8	C12H8O4
	Bergaptol	486-60-2	C11H6O4
	beta-Alanine	107-95-9	C3H7NO2
	beta-Asarone	5273-86-9	C12H16O3
	Beta-Carotene	7235-40-7	C40H56
	beta-Citronellol;(S)-(-)-beta-Citronellol	106-22-9;1117-61-9;7540-51-4	C10H20O
	Beta-D-Fructose 2-phosphate		C6H13O9P
	Beta-D-Glucose;alpha-D-Glucose	492-61-5;492-62-6	C6H12O6
	beta-Glucogallin	13405-60-2	C13H16O10
	beta-Ionone	79-77-6	C13H20O
	beta-Lactose	5965-66-2	C12H22O11
	Beta-mangostin	20931-37-7	C25H28O6
	beta-Nicotinamide mononucleotide	1094-61-7	C11H15N2O8P
	Beta-Tocopherol	148-03-8	C28H48O2
	Betaine aldehyde	7418-61-3	C5H11NO
	Betulinic acid;Beta-boswellic acid;a,b-Elemolic acid;3-Epikatonic acid;Isomangiferolic acid;Trametenolic acid;Bryonolic acid;3-Epioleanolic acid	472-15-1;631-69-6;28282-27-1;76035-62-6;13878-92-7;24160-36-9;24480-45-3;25499-90-5	C30H48O3
	Biliverdin	114-25-0	C33H34N4O6
	Biochanin A	491-80-5	C16H12O5
	Bisabolol oxide A	22567-36-8	C15H26O2
	Brazilin	474-07-7	C16H14O5
	Bromocriptine	25614-03-3	C32H40BrN5O5
	Broussonin C	76045-49-3	C20H24O3
	Brucine	4845-99-2;357-57-3	C23H26N2O4
	Bryodulcosigenin	4965-97-3	C30H50O4
	Bufalin	465-21-4	C24H34O4
	Butin;2'-Hydroxydihydrodaidzein	492-14-8	C15H12O5
	Butyl 4-Hydroxybenzoate	94-26-8	C11H14O3
	Byakangelicol	26091-79-2	C17H16O6
	C-Veratroylglycol	168293-10-5	C10H12O5
	Caffeic acid	331-39-5	C9H8O4
	Cajanol	61020-70-0	C17H16O6
	Calystegine A7	197565-90-5	C7H13NO3
	Campesterol	474-62-4	C28H48O
	Cannabidiol	13956-29-1	C21H30O2
	Cannabinol	521-35-7	C21H26O2
	Cantharidin	56-25-7	C10H12O4
	Canthaxanthin	514-78-3	C40H52O2
	Capsidiol	37208-05-2	C15H24O2
	Carbendazim	10605-21-7	C9H9N3O2
	Carbofuran	1563-66-2	C12H15NO3
	Cardanol (C15:1)	501-26-8	C21H34O
	Carnosol	5957-80-2	C20H26O4
	Caryophyllene oxide	1139-30-6	C15H24O
	Catalpalactone	1585-68-8	C15H14O4
	Cathinone	71031-15-7	C9H11NO
	Cedeodarin	31076-39-8	C16H14O8
	Cedrelone;Isomangiferin	1254-85-9;24699-16-9	C26H30O5;C19H18O11
	Cevadine	62-59-9	C32H49NO9
	Chalconaringenin	73692-50-9	C15H12O5
	Chalepensin	13164-03-9	C16H14O3
	Cheilanthifoline	483-44-3	C19H19NO4
	Chlorogenic acid	327-97-9;202650-88-2	C16H18O9
	Chondroitin sulfate	9007-28-7	C13H21NO15S
	Chrysin	480-40-0	C15H10O4
	Chrysoeriol 7-apiosylglucoside	33579-63-4	C27H30O15
	Cinchonine	118-10-5	C19H22N2O
	Cineole	470-82-6	C10H18O
	Cinnamic acid	621-82-9	C9H8O2
	Cinnamyl acetat	103-54-8	C11H12O2
	Cinnamyl cinnamate	122-69-0	C18H16O2
	cis-2-Methylaconitate	6061-93-4	C7H8O6
	cis-Aconitic acid	499-12-7;585-84-2	C6H6O6
	cis-Zeatin	32771-64-5	C10H13N5O
	Citrostadienol	474-40-8	C30H50O
	Cleomiscosin A	76948-72-6	C20H18O8
	Cochlearine	52418-07-2	C15H19NO3
	Coclaurine	486-39-5	C17H19NO3
	Colneleate	52761-34-9	C18H30O3
	Coniferyl alcohol	458-35-5;32811-40-8	C10H12O3
	Cordycepin	73-03-0	C10H13N5O3
	Corticosterone	50-22-6	C21H30O4
	Corydaline	518-69-4	C22H27NO4
	Costunolide	553-21-9	C15H20O2
	Crotaline	315-22-0	C16H23NO6
	Crotanecine	5096-50-4	C8H13NO3
	Crotonoside	1818-71-9	C10H13N5O5
	Cryptomeridiol	4666-84-6	C15H28O2
	Cucurbitacin E	18444-66-1	C32H44O8
	Cupressuflavone	3952-18-9	C30H18O10
	Curcolone	17015-43-9	C15H18O3
	Curcumin	458-37-7	C21H20O6
	Curcumol	4871-97-0	C15H24O2
	Cyanidin-3-O-rhamnoside chloride	38533-30-1	C21H21O10
	Cyanidin-3-O-rutinoside chloride	18719-76-1	C27H31ClO15
	Cycloeucalenol	469-39-6	C30H50O
	Cynarin;1,5-Dicaffeoylquinic acid	30964-13-7	C25H24O12
	Cynaroside	5373-11-5	C21H20O11
	Cyperotundone		C15H22O
	CYS-GLY;Cysteinylglycine	19246-18-5	C5H10N2O3S
	Cytidine	65-46-3	C9H13N3O5
	D-alpha-Aminobutyric acid	2623-91-8	C4H9NO2
	D-Aspartic acid	1783-96-6	C4H7NO4
	D-Glutamine	5959-95-5	C5H10N2O3
	D-Maltose	69-79-4	C12H22O11
	D-Pinitol	10284-63-6	C7H14O6
	D-Proline	344-25-2	C5H9NO2
	D-Serine	312-84-5	C3H7NO3
	D-Xylulose	551-84-8	C5H10O5
	Daphnoretin	2034-69-7	C19H12O7
	Decursin;5-Geranoxy-7-methoxycoumarin;Decursinol angelate	5928-25-6;7380-39-4;130848-06-5	C19H20O5;C20H24O4
	Deethylatrazine	6190-65-4	C6H10ClN5
	Deguelin	522-17-8	C23H22O6
	Delphinidin	528-53-0	C15H10O7
	Delphinidin-3-O-glucoside;Isoquercitrin	6906-38-3;50986-17-9;482-35-9	C21H20O12
	Delta-Tocotrienol	25612-59-3	C27H40O2
	Deltonin;Gracillin	55659-75-1;19083-00-2	C45H72O17
	Denudatine	26166-37-0	C22H33NO2
	Deoxyadenosine	958-09-8	C10H13N5O3
	Deoxycorticosterone	64-85-7	C21H30O3
	Deoxylapachol	3568-90-9	C15H14O2
	Desacetylmatricarin	10180-88-8	C15H18O4
	Desmethylxanthohumol	115063-39-3	C20H20O5
	Desoxypeganine	495-59-0	C11H12N2
	DG(16:0/16:0/0:0)	30334-71-5	C35H68O5
	Dhurrin	499-20-7	C14H17NO7
	Diallyl disulfide	2179-57-9	C6H10S2
	Dictamnine	484-29-7	C12H9NO2
	Dihydrocapsaicin	19408-84-5	C18H29NO3
	Dihydroconiferyl alcohol	2305-13-7	C10H14O3
	Dihydrokavain	587-63-3	C14H16O3
	Dihydromethysticin	19902-91-1	C15H16O5
	Dihydromyricetin	27200-12-0	C15H12O8
	Dihydrorotenone	6659-45-6	C23H24O6
	Diosmin	520-27-4	C28H32O15
	Diphyllin	22055-22-7	C21H16O7
	Dipterocarpol	471-69-2	C30H50O2
	DL-Alanine;L-Alanine	302-72-7;56-41-7	C3H7NO2
	DL-alpha-Tocopherylacetate	7695-91-2	C31H52O3
	DL-Benzylsuccinic acid		C11H12O4
	DL-Dihydrozeatin	14894-18-9	C10H15N5O
	DL-Tyrosine	556-03-6	C9H11NO3
	Docosahexaenoic acid	6217-54-5	C22H32O2
	Droserone	478-40-0	C11H8O4
	Dulcoside A	64432-06-0	C38H60O17
	dUMP	964-26-1	C9H13N2O8P
	Ecgonine	481-37-8	C9H15NO3
	Eicosapentaenoic acid	10417-94-4	C20H30O2
	Encecalin	20628-09-5	C14H16O3
	Enterolactone	78473-71-9	C18H18O4
	Ephedrine	299-42-3	C10H15NO
	Epifriedelanol	16844-71-6	C30H52O
	Ergocristine	511-08-0	C35H39N5O5
	Ergosterol peroxide	2061-64-5	C28H44O3
	Erucic acid	112-86-7	C22H42O2
	Erysotrine	27740-43-8	C19H23NO3
	Erythritol	149-32-6	C4H10O4
	Esculin	531-75-9	C15H16O9
	Estradiol-17beta 3-sulfate	4999-79-5	C18H24O5S
	Estriol 3-sulfate 16-glucuronide	4661-65-8	C24H32O12S
	Ethyl 3,4,5-trimethoxybenzoate	6178-44-5	C12H16O5
	Ethyl caproate	123-66-0	C8H16O2
	Ethyl cinnamate	103-36-6	C11H12O2
	Ethyl trans-p-methoxycinnamate	1929-30-2	C12H14O3
	Eurycomalactone;Ingenol	23062-24-0;30220-46-3	C19H24O6;C20H28O5
	Exemestane	107868-30-4	C20H24O2
	Ferulic acid; Trans-Ferulic acid;trans-Ferulic acid	1135-24-6;537-98-4	C10H10O4
	Fisetin	528-48-3	C15H12O6
	Flavin adenine dinucleotide (FAD)	146-14-5	C27H33N9O15P2
	Fucoxanthin	3351-86-8	C42H58O6
	Furanodiene	19912-61-9	C15H20O
	Furfuryl acetate	623-17-6	C7H8O3
	Fustin	20725-03-5	C15H12O6
	Galactinol	3687-64-7	C12H22O11
	Gallocatechin	970-73-0	C15H14O7
	gamma-Hydroxy-3-pyridinebutanoate	15569-97-8	C9H11NO3
	Ganoderenic acid E	110241-23-1	C30H40O8
	Ganoderic acid A;Ganoderenic acid C;Ganoderic acid B	81907-62-2;100665-42-7;81907-61-1	C30H44O7
	Ganoderic acid F	98665-15-7	C32H42O9
	Ganoderic acid H	98665-19-1	C32H44O9
	Ganoderic acid N	110241-19-5	C30H42O8
	Garcinone D	107390-08-9	C24H28O7
	Genipin-1-O-gentiobioside	29307-60-6	C23H34O15
	Geniposide	24512-63-8	C17H24O10
	Genistein	446-72-0	C15H10O5
	Genistin;Genistein 7-O-Glucoside (Genistin)	529-59-9	C21H20O10
	Genkwanin	437-64-9	C16H12O5
	Gentioflavin	18058-50-9	C10H11NO3
	Geranylacetate	105-87-3	C12H20O2
	Gibberellin A4	468-44-0	C19H24O5
	Ginsenoside F3	62025-50-7	C41H70O13
	Glabridin	59870-68-7	C20H20O4
	Glucoliquiritin	93446-18-5	C27H32O14
	Gluconapin	19041-09-9	C11H19NO9S2
	Glucosamine	3416-24-8	C6H13NO5
	Glucose 1-phosphate	59-56-3	C6H13O9P
	Glutathione	70-18-8	C10H17N3O6S
	Glutinone	508-09-8	C30H48O
	Glyceric acid	473-81-4	C3H6O4
	Glycerophosphocholine	28319-77-9	C8H20NO6P
	Glycitein	40957-83-3	C16H12O5
	Glycitin	40246-10-4	C22H22O10
	Goshonoside F1	90851-24-4	C26H44O8
	Gramine	87-52-5	C11H14N2
	Grossamide	80510-06-1	C36H36N2O8
	Guaiacol	90-05-1	C7H8O2
	Guaiol	489-86-1	C15H26O
	Guanidineacetic acid	352-97-6	C3H7N3O2
	Guanine	73-40-5	C5H5N5O
	Guanosine	118-00-3	C10H13N5O5
	Guanosine 3',5'-cyclic monophosphate	7665-99-8	C10H12N5O7P
	Guggulsterone E&Z	95975-55-6	C22H30O3
	Harmaline	304-21-2	C13H14N2O
	Herniarin	531-59-9	C10H8O3
	Hesperetin	520-33-2	C16H14O6
	Hesperetin 7-O-glucoside	31712-49-9	C22H24O11
	Hesperidin	520-26-3	C28H34O15
	Hinokiflavone	19202-36-9	C30H18O10
	Homobaldrinal	67910-07-0	C15H16O4
	Homodihydrocapsaicin I	20279-06-5	C19H31NO3
	Homoeriodictyol	446-71-9	C16H14O6
	Homoferreirin	482-01-9	C17H16O6
	Homoorientin	4261-42-1	C21H20O11
	Homopterocarpin	606-91-7	C17H16O4
	Huperzine B	103548-82-9	C16H20N2O
	Hydrangenol	480-47-7	C15H12O4
	Hydroxysafflor yellow A	78281-02-4	C27H32O16
	Hygromycin B	31282-04-9	C20H37N3O13
	Hyodeoxycholic acid	83-49-8	C24H40O4
	Hypaphorine	487-58-1	C14H18N2O2
	Hypotaurine	300-84-5	C2H7NO2S
	Indaconitine	4491-19-4	C34H47NO10
	Indole	120-72-9	C8H7N
	Indole-3-acetic acid	87-51-4	C10H9NO2
	Indole-3-carboxaldehyde	487-89-8	C9H7NO
	Inosine	58-63-9	C10H12N4O5
	Inositol	643-10-7;87-89-8	C6H12O6
	Ipecoside	15401-60-2	C27H35NO12
	Isoalantolactone	470-17-7	C15H20O2
	Isodiospyrin	20175-84-2	C22H14O6
	Isofraxidin	486-21-5	C11H10O5
	Isoleucine	443-79-8	C6H13NO2
	isoliquiritigenin	961-29-5	C15H12O4
	Isonicotinic acid	55-22-1	C6H5NO2
	Isoquercitrin	482-35-9	C21H20O12
	Isoquinoline;Quinoline	119-65-3;91-22-5	C9H7N
	Isorhamnetin	480-19-3	C16H12O7
	Isorubrofusarin 10-gentiobioside;Rubrofusarin-6-O-beta-D-gentiobioside;Cassiaside C	200127-93-1;24577-90-0;119170-52-4	C27H32O15
	Isosakuranetin	480-43-3	C16H14O5
	Isovitexin	38953-85-4	C21H20O10
	Isoxanthopterin	529-69-1	C6H5N5O2
	Itaconic acid	97-65-4	C5H6O4
	Jangomolide	93767-25-0	C26H28O8
	Kaempferol	520-18-3	C15H10O6
	Kaempferol-3-O-rutinoside	17650-84-9	C27H30O15
	Kakuol	18607-90-4	C10H10O4
	Karanjin	521-88-0	C18H12O4
	Kaurenoic acid	6730-83-2	C20H30O2
	Kazinol A	99624-28-9	C25H30O4
	Kirenol	52659-56-0	C20H34O4
	Kojibiose	2140-29-6	C12H22O11
	Kuwanon H	76472-87-2	C45H44O11
	Kynurenic acid	492-27-3	C10H7NO3
	L-3-Phenyllactic acid	20312-36-1;7326-19-4	C9H10O3
	L-Acetylcarnitine	5080-50-2	C9H17NO4
	L-Arginine	74-79-3	C6H14N4O2
	L-Asparagine	70-47-3	C4H8N2O3
	L-Aspartic acid	56-84-8	C4H7NO4
	L-Citruline;L-Citrulline	372-75-8	C6H13N3O3
	L-Glutamic acid	56-86-0	C5H9NO4
	L-Gulose	6027-89-0	C6H12O6
	L-Histidine	71-00-1	C6H9N3O2
	L-Homocitrulline	1190-49-4	C7H15N3O3
	L-Homoglutamic acid	542-32-5;1118-90-7	C6H11NO4
	L-Homoserine	1927-25-9;672-15-1;6027-21-0	C4H9NO3
	L-Isoleucine;L-Leucine	73-32-5;61-90-5	C6H13NO2
	L-Lysine;L-Glutamine	56-87-1;56-85-9	C6H14N2O2;C5H10N2O3
	L-Malic acid	97-67-6	C4H6O5
	L-Methionine	63-68-3	C5H11NO2S
	L-Nicotine	54-11-5	C10H14N2
	L-Norleucine	327-57-1	C6H13NO2
	L-Phenylalanine;D-(+)-Phenylalanine;DL-Phenylalanine	63-91-2;673-06-3;150-30-1	C9H11NO2
	L-Pipecolic acid	535-75-1;3105-95-1	C6H11NO2
	L-Quebrachitol	642-38-6	C7H14O6
	L-Serine	56-45-1	C3H7NO3
	L-Theanine	3081-61-6	C7H14N2O3
	L-Threonine	72-19-5	C4H9NO3
	L-Tyrosine	60-18-4	C9H11NO3
	Lactaroviolin	85-33-6	C15H14O
	Lactulose	4618-18-2	C12H22O11
	Lactupicrin	65725-11-3	C23H22O7
	Lancerin	81991-99-3	C19H18O10
	Lansiumarin A	205115-73-7	C21H20O5
	Lathosterol	80-99-9	C27H46O
	Leucodopachrome	18766-67-1	C9H9NO4
	Leukoaminochrome	29539-03-5	C8H9NO2
	Levamisole	14769-73-4	C11H12N2S
	Levodopa	59-92-7	C9H11NO4
	Levonorgestrel	797-63-7	C21H28O2
	Limonexic acid	99026-99-0	C26H30O10
	Lincomycin	154-21-2	C18H34N2O6S
	Linderalactone	728-61-0	C15H16O3
	Linolenic acid	463-40-1	C18H30O2
	Loganin	18524-94-2	C17H26O10
	Lonicerin	25694-72-8	C27H30O15
	Lubiprostone	136790-76-6;333963-40-9	C20H32F2O5
	Lucidadiol	252351-95-4	C30H48O3
	Lumichrome	1086-80-2	C12H10N4O2
	Lupanine	550-90-3	C15H24N2O
	Lupeol	545-47-1	C30H50O
	Lutein	127-40-2	C40H56O2
	Luteolin	491-70-3	C15H10O6
	Luteolin-6-C-glucoside;Orientin	4261-42-1;28608-75-5	C21H20O11
	Maclurin	519-34-6	C13H10O6
	Maltol	118-71-8	C6H6O3
	Mandelic acid	611-71-2	C8H8O3
	Mannose 6-phosphate		C6H13O9P
	Matrine	519-02-8	C15H24N2O
	Mellein	480-33-1	C10H10O3
	Meloside A	60767-80-8	C27H30O15
	Metanephrine	5001-33-2	C10H15NO3
	Methoxyindoleacetic acid	3471-31-6	C11H11NO3
	Methyl anthranilate	134-20-3	C8H9NO2
	Methyl caffeate acid	3843-74-1	C10H10O4
	Methyl cinnamate	103-26-4	C10H10O2
	Methyl gallate	99-24-1	C8H8O5
	Methyl hesperidin	11013-97-1	C29H36O15
	Methyl jasmonate	39924-52-2	C13H20O3
	Methyl linoleate	112-63-0	C19H34O2
	Methyl reserpate	2901-66-8	C23H30N2O5
	Methylecgonine	7143-09-1	C10H17NO3
	Methylimidazole acetaldehyde	19639-03-3	C6H8N2O
	Methylisopelletierine	18747-42-7	C9H17NO
	Mevastatin	73573-88-3	C23H34O5
	Miltirone	27210-57-7	C19H22O2
	Mitraphylline	509-80-8	C21H24N2O4
	Moracin C	69120-06-5	C19H18O4
	Morin	480-16-0	C15H10O7
	Morroniside	25406-64-8	C17H26O11
	Morusin	62596-29-6	C25H24O6
	Mulberrofuran A	68978-04-1	C25H28O4
	Mulberrofuran C	77996-04-4	C34H28O9
	Mulberrofuran Q	101383-35-1	C34H24O10
	Muramic acid	1114-41-6	C9H17NO7
	N-((-)-jasmonoyl)-S-isoleucine	120330-92-9	C18H29NO4
	N-(p-Hydroxyphenethyl)actinidine	15794-92-0	C18H22NO
	N-Acetyl-5-hydroxytryptamine	1210-83-9	C12H14N2O2
	N-Acetyl-L-glutamate 5-semialdehyde	13074-21-0	C7H11NO4
	N-Acetyl-L-glutamic acid	1188-37-0	C7H11NO5
	N-Acetyl-L-histidine	2497-02-1	C8H11N3O3
	N-Acetylarylamine	103-84-4	C8H9NO
	N-Ethylglycine		C4H9NO2
	N-Feruloyl putrescine	501-13-3	C14H20N2O3
	N-hydroxy tryptamine		C10H12N2O
	N-Methylcoclaurine	5096-70-8	C18H21NO3
	N-p-Coumaroyl putrescine	34136-53-3	C13H18N2O2
	N-p-Coumaroyloctopamine	66648-45-1	C17H17NO4
	N-γ-Acetyl-N-2-Formyl-5-methoxykynurenamine	52450-38-1	C13H16N2O4
	N,N-Dimethyl-1,4-phenylenediamine	99-98-9	C8H12N2
	N,N-Dimethylglycine	1118-68-9	C4H9NO2
	N,N'-diacetylchitobiose	35061-50-8	C16H28N2O11
	N'-Formylkynurenine	1022-31-7	C11H12N2O4
	N1-(alpha-D-ribosyl)-5,6-dimethyl-benzimidazole	132-13-8	C14H18N2O4
	N1-Methyl-2-pyridone-5-carboxamide	701-44-0	C7H8N2O2
	N1-Methyl-4-pyridone-3-carboxamide	769-49-3	C7H8N2O2
	N6-Acetyl-L-lysine	692-04-6	C8H16N2O3
	N6-isopentenyladenosine	7724-76-7	C15H21N5O4
	Nandrolone	434-22-0	C18H26O2
	Narciclasine	29477-83-6	C14H13NO7
	Narcissoside	604-80-8	C28H32O16
	Naringenin	480-41-1	C15H12O5
	Naringenin chalcone	25515-46-2	C15H12O5
	Narirutin	14259-46-2	C27H32O14
	Nemorensine	50906-96-2	C18H27NO5
	Neocnidilide	4567-33-3	C12H18O2
	Neoglycyrol	23013-84-5	C21H18O6
	Neogrifolin;Grifolin;Ugaxanthone	23665-96-5;6903-07-7;13179-11-8	C22H32O2;C18H16O6
	Neohesperidin	13241-33-3	C28H34O15
	Nerylacetate	141-12-8	C12H20O2
	NG,NG-Dimethylarginine dihydrochloride	220805-22-1;30315-93-6	C8H18N4O2
	Nicotinamide	98-92-0	C6H6N2O
	Nicotinate ribonucleoside		C11H13NO6
	Nicotinic acid	59-67-6	C6H5NO2
	Nicotinic acid adenine dinucleotide;NAD	53-84-9	C21H27N7O14P2
	Nordihydrocapsaicin	28789-35-7	C17H27NO3
	Nordihydroguaiaretic acid	500-38-9	C18H22O4
	Norlichexanthone	20716-98-7	C14H10O5
	Notopterol	88206-46-6	C21H22O5
	O-Acetylethanolamine	1854-30-4	C4H9NO2
	O-Phosphocholine	3616-04-4;107-73-3	C4H12NO4P
	Octadecanamide	124-26-5	C18H37NO
	Octadecyl p-coumarate	72943-88-5	C27H44O3
	Octyl Gallate	1034-01-1	C15H22O5
	Officinalisinin I	57944-18-0	C45H76O19
	Oleic acid;Vaccenic acid;Petroselinic acid	112-80-1;693-72-1;593-39-5	C18H34O2
	Oleocanthal	289030-99-5	C17H20O5
	Oleuropein	32619-42-4	C25H32O13
	Oleuroside	116383-31-4	C25H32O13
	Ononin	486-62-4	C22H22O9
	Orobol (5,7,3',4'-tetrahydroxyisoflavone)	480-23-9	C15H10O6
	Osthol	484-12-8	C15H16O3
	Otonecine	6887-34-9	C9H15NO3
	Oxymatrine	16837-52-8	C15H24N2O2
	Oxymorphone	76-41-5	C17H19NO4
	p-Aminobenzoate	150-13-0	C7H7NO2
	p-Coumaryl alcohol	3690-05-9	C9H10O2
	p-Cresol	106-44-5	C7H8O
	p-Hydroxymandelic acid	1198-84-1	C8H8O4
	p-Octopamine	104-14-3	C8H11NO2
	Paeonolide	72520-92-4	C20H28O12
	Palmitic acid	57-10-3	C16H32O2
	Palmitoylethanolamide	544-31-0	C18H37NO2
	Panaxynol	81203-57-8	C17H24O
	Pedalitin	22384-63-0	C16H12O7
	Pelargonidin-3-O-glucoside	18466-51-8	C21H20O10
	Perakine	4382-56-3	C21H22N2O3
	Phendimetrazine	634-03-7	C12H17NO
	Phenethylamine	64-04-0	C8H11N
	Phenylacetonitrile	140-29-4	C8H7N
	Phenylacetyl-L-glutamine	28047-15-6	C13H16N2O4
	Phenylacetylglycine	500-98-1	C10H11NO3
	Phillyrin;Phillyroside	487-41-2	C27H34O11
	Phloretic acid;Ethylparaben;3-(2-Hydroxyphenyl)propanoic acid	501-97-3;120-47-8;495-78-3	C9H10O3
	Phosphonoacetate	4408-78-0	C2H5O5P
	Phosphoric acid	7664-38-2	H3O4P
	Phosphorylcholine	107-73-3	C5H14NO4P
	Physalin A	23027-91-0	C28H30O10
	Physalin D	54980-22-2	C28H32O11
	Physalin G	76045-38-0	C28H30O10
	Physalin L;Physalin O	113146-74-0;120849-18-5	C28H32O10
	Physcion 1-O-beta-D-glucoside;Physcion 8-O-beta-D-monoglucoside;Sissotrin	26296-54-8;23451-01-6;5928-26-7	C22H22O10
	Picrasin B	26121-56-2	C21H28O6
	Picrocrocin	138-55-6	C16H26O7
	Pilocarpine	92-13-7	C11H16N2O2
	Pimelic acid	111-16-0	C7H12O4
	Pinobanksin	548-82-3	C15H12O5
	Pinoresinol dimethyl ether	29106-36-3	C22H26O6
	Piperidine	110-89-4	C5H11N
	Piperitenone	491-09-8	C10H14O
	Pipermethystine	71627-22-0	C16H17NO4
	Plantagoside	78708-33-5	C21H22O12
	Podophyllotoxin	518-28-5	C22H22O8
	Ponasterone A	13408-56-5	C27H44O6
	Poncirin	14941-08-3	C28H34O14
	Porson	56222-03-8	C22H26O6
	Pregabalin	148553-50-8	C8H17NO2
	Primin	15121-94-5	C12H16O3
	Procyanidin A1	103883-03-0	C30H24O12
	Proline betaine	471-87-4	C7H13NO2
	Proline;L-Proline	147-85-3	C5H9NO2
	Propyl paraben	94-13-3	C10H12O3
	Protopine	130-86-9	C20H19NO5
	Protoveratrine A	143-57-7	C41H63NO14
	Pseudotropine	135-97-7	C8H15NO
	Pseudouridine 5'-phosphate	1157-60-4	C9H13N2O9P
	Psoralidin	18642-23-4	C20H16O5
	Pterosin D	34169-70-5	C15H20O3
	Punicalin	65995-64-4	C34H22O22
	Purine	120-73-0	C5H4N4
	Pyridoxal 5'-phosphate	54-47-7	C8H10NO6P
	Pyridoxamine 5'-phosphate	529-96-4	C8H13N2O5P
	Pyridoxine	65-23-6	C8H11NO3
	Pyrogallol;1,2,3-Trihydroxybenzene	87-66-1	C6H6O3
	Pyrrole-2-carboxylic acid	634-97-9	C5H5NO2
	Pyrrolidonecarboxylic acid	4042-36-8	C5H7NO3
	Quercetagetin	90-18-6	C15H10O8
	Quercetin 3-O-neohesperidoside	32453-36-4	C27H30O16
	Quercetin-7-O-beta-D-glucopyranoside	491-50-9	C21H20O12
	Quercitrin	522-12-3	C21H20O11
	Questinol	35688-09-6	C16H12O6
	Quillaic acid	631-01-6	C30H46O5
	Rapanone	573-40-0	C19H30O4
	Rhoifolin	17306-46-6	C27H30O14
	Rhombifoline	529-78-2	C15H20N2O
	Riboflavine	83-88-5	C17H20N4O6
	Ricinoleic acid	141-22-0	C18H34O3
	Riddelline	23246-96-0	C18H23NO6
	Robinetin	490-31-3	C15H10O7
	Rotenone	83-79-4	C23H22O6
	Ruscogenin	472-11-7	C27H42O4
	Rutacridone	17948-33-3	C19H17NO3
	Rutaevin	33237-37-5	C26H30O9
	Rutin	153-18-4	C27H30O16
	S-(Phenylacetothiohydroximoyl)-L-cysteine		C11H14N2O3S
	S-Adenosylmethionine	29908-03-0	C15H22N6O5S
	Safflor Yellow A	85532-77-0	C27H30O15
	Safrole	94-59-7	C10H10O2
	Sakuranetin	2957-21-3	C16H14O5
	Salannin	992-20-1	C34H44O9
	Salsolinol	27740-96-1	C10H13NO2
	Saponarin	20310-89-8	C27H30O15
	Sarsasapogenin	126-19-2	C27H44O3
	Schisandrol A	7432-28-2	C24H32O7
	Schisantherin A	58546-56-8	C30H32O9
	Schisantherin B	58546-55-7	C28H34O9
	Sciadopitysin	521-34-6	C33H24O10
	Scoparone	120-08-1	C11H10O4
	Securinine	5610-40-2	C13H15NO2
	Serotonin	50-67-9	C10H12N2O
	Sesamin	607-80-7	C20H18O6
	Sesamol	533-31-3	C7H6O3
	Sesamolin	526-07-8	C20H18O7
	Sesartemin	77394-27-5	C23H26O8
	Shikonin	517-89-5	C16H16O5
	Shionone	10376-48-4	C30H50O
	Silychristin	33889-69-9	C25H22O10
	Sinalbin	20196-67-2	C14H19NO10S2
	Sinapyl alcohol	537-33-7	C11H14O4
	Sipeimine	61825-98-7	C27H43NO3
	Sitostenone	1058-61-3	C29H48O
	Solasodine	126-17-0	C27H43NO2
	Sphingosine	123-78-4	C18H37NO2
	Spinosin	72063-39-9	C28H32O15
	Stearic Acid	57-11-4	C18H36O2
	Sterebin A	107647-14-3	C18H30O4
	Sterebin E	114343-74-7	C20H34O4
	Stigmasterol	83-48-7	C29H48O
	Streptomycin	57-92-1	C21H39N7O12
	Streptozotocin	18883-66-4	C8H15N3O7
	Strychnine	57-24-9	C21H22N2O2
	Sucrose	57-50-1	C12H22O11
	Sugiol	511-05-7	C20H28O2
	Sulforaphane	4478-93-7	C6H11NOS2
	Sweroside	14215-86-2	C16H22O9
	Swertiajaponin	6980-25-2	C22H22O11
	Swertiamarin	17388-39-5	C16H22O10
	Symlandine;Symphytine	74410-74-5;22571-95-5	C20H31NO6
	Synephrine	94-07-5	C9H13NO2
	Syringic acid	530-57-4	C9H10O5
	Syringin	118-34-3	C17H24O9
	Tacrolimus	104987-11-3	C44H69NO12
	Talatisamine	20501-56-8	C24H39NO5
	Tangeretin	481-53-8	C20H20O7
	Taurohyocholate		C26H45NO7S
	Taxifolin	480-18-2	C15H12O7
	Taxiphyllin	21401-21-8	C14H17NO7
	Tectochrysin	520-28-5	C16H12O4
	Tectorigenin	548-77-6	C16H12O6
	Tenulin	19202-92-7	C17H22O5
	Terpinine-4-ol	562-74-3	C10H18O
	Terpinolene	586-62-9	C10H16
	Tetrahymanol	2130-17-8	C31H54O
	Tetrodotoxin	4368-28-9	C11H17N3O8
	Theobromine	83-67-0	C7H8N4O2
	Thiamine	59-43-8	C12H16N4OS
	Thymidine	50-89-5	C10H14N2O5
	Tombozine	604-99-9	C19H22N2O
	Torachrysone 8-O-glucoside	64032-49-1	C20H24O9
	trans-3,5-Dimethoxy-4-hydroxy cinnamaldehydee	4206-58-0	C11H12O4
	trans-4-Hydroxy-L-proline;4-Hydroxyproline	51-35-4	C5H9NO3
	Trans-caffeic acid	501-16-6	C9H8O4
	trans-Caryophyllene	87-44-5	C15H24
	trans-Hinokiresinol	17676-24-3	C17H16O2
	trans-Zeatin	1637-39-4	C10H13N5O
	trans-Zeatin-riboside	6025-53-2	C15H21N5O5
	Triangularine	87340-27-0	C18H25NO5
	Tricin	520-32-1	C17H14O7
	Tricyclazole	41814-78-2	C9H7N3S
	Trifolirhizin	6807-83-6	C22H22O10
	Trigonelline	535-83-1	C7H7NO2
	Trimethylapigenin	5631-70-9	C18H16O5
	Tripdiolide	38647-10-8	C20H24O7
	Tropine acetate;3-Acetoxytropane	3423-27-6;3423-26-5	C10H17NO2
	Tryptophan;L-Tryptophan;D-Tryptophan	54-12-6;73-22-3;153-94-6	C11H12N2O2
	Turanose	547-25-1	C12H22O11
	Tussilagine	80151-77-5	C10H17NO3
	Undecanolactone	710-04-3	C11H20O2
	Uracil	66-22-8	C4H4N2O2
	Uridine	58-96-8	C9H12N2O6
	Uridine 5'-diphospho-D-glucose;UDP-D-galactose;Uridine diphosphategalactose	133-89-1;2956-16-3	C15H24N2O17P2
	Urocanic acid	104-98-3	C6H6N2O2
	Ursodeoxycholic acid	128-13-2	C24H40O4
	Valerenic acid	3569-10-6	C15H22O2
	Vanillic acid	121-34-6	C8H8O4
	Vanillin	121-33-5	C8H8O3
	Vasicine	6159-55-3	C11H12N2O
	Vasicinone	486-64-6	C11H10N2O2
	Venlafaxine	93413-69-5	C17H27NO2
	Vidarabine	5536-17-4;24356-66-9	C10H13N5O4
	Vitamin A2 aldehyde	472-87-7	C20H26O
	Vitamin D2 (Ergocalciferol)	50-14-6	C28H44O
	Vitamin K1	84-80-0	C31H46O2
	Vitexin	3681-93-4	C21H20O10
	Vitexin 2''-glucoside	61360-94-9	C27H30O15
	Vitexin rhamnoside	64820-99-1	C27H30O14
	Withanolide A	32911-62-9	C28H38O6
	Xanthatin	26791-73-1	C15H18O3
	Xanthosine	146-80-5	C10H12N4O6
	Xanthotoxol	2009-24-7	C11H6O4
	Xylometazoline	526-36-3	C16H24N2
	Yangonin	500-62-9	C15H14O4
	Yatein	40456-50-6	C22H24O7
	Yohimbic acid monohydrate	522-87-2	C20H24N2O3
	Yohimbine	146-48-5	C21H26N2O3
	Zeorin;Dammarenediol II	22570-53-2;14351-29-2	C30H52O2
	Zeranol	26538-44-3	C18H26O5
	Zingerone	122-48-5	C11H14O3
