# Supplementary material for: Mitigation mechanism of zinc oxide nanoparticles on cadmium toxicity in tomato
Source: Front Plant Sci. 2023 Mar 27;14:1162372. doi: 10.3389/fpls.2023.1162372 (PMC10083253; doi:10.3389/fpls.2023.1162372)
Supplement: Supplementary file 3 [file Table_2.xlsx]

## Sheet: Sheet1
	Table S2.The differentially accumulated metabolites in Tomato (Solanum lycopersicum cv. Micro-Tom) seedlings.
	DAMs in the leaves			DAMs in the Roots
	compound name			compound name
	Xanthatin			Zingerone
	2-Hydroxy-6-oxo-6-(2-carboxyphenyl)-hexa-2,4-dienoate			Yangonin
	7-Methylguanine			Xanthatin
	8(R)-HPETE			Vitexin 2''-glucoside
	S-(Phenylacetothiohydroximoyl)-L-cysteine			Vitamin K1
	3-Methy-L-histidine			Vidarabine
	4-Aminobutyric acid			Vasicine
	beta-Alanine			Vanillin
	CYS-GLY;Cysteinylglycine			Vanillic acid
	Glutathione			Ursodeoxycholic acid
	L-Arginine			Uridine diphosphategalactose
	L-Aspartic acid			Uracil
	L-Citruline;L-Citrulline			Undecanolactone
	Proline;L-Proline			Turanose
	Bisabolol oxide A			Tryptophan
	Furanodiene			Tropine acetate
	Cinnamyl cinnamate			Tripdiolide
	Coniferyl alcohol			Trimethylapigenin
	Ferulic acid			Trigonelline
	Isofraxidin			trans-Zeatin-riboside
	p-Coumaryl alcohol			Tenulin
	p-Aminobenzoate			Taxiphyllin
	N1-Methyl-4-pyridone-3-carboxamide			Taxifolin
	Desmethylxanthohumol			Syringin
	Phosphorylcholine			Syringic acid
	Isoxanthopterin			Swertiajaponin
	Aurantio-obtusin			Sucrose
	Questinol			Spinosin
	Sterebin A			Silychristin
	2-(Methylamino)benzoic acid			Sesamol
	2-Hydroxy-3-(4-hydroxyphenyl)propenoic acid			Serotonin
	Benzocaine			Securinine
	N-Acetylarylamine			Scoparone
	N-Feruloyl putrescine			Sarsasapogenin
	3-Ethyl-1,2-benzenediol			Saponarin
	3-Methoxy-4-hydroxyphenylglycolaldehyde			Safflor Yellow A
	6-Gingerol			S-Adenosylmethionine
	Kakuol			Rutin
	Mulberrofuran Q			Riboflavine
	p-Hydroxymandelic acid			Rhoifolin
	Propyl paraben			Rapanone
	Phloretic acid;Ethylparaben			Quillaic acid
	Adenosine			Questinol
	Adenosine 3'-monophosphate			Pyrrole-2-carboxylic acid
	Adenosine 5'-monophosphate			Pyridoxamine 5'-phosphate
	beta-Nicotinamide mononucleotide			Purine
	Cytidine			Pterosin D
	Guanosine			Pseudotropine
	Inosine			Proline;L-Proline
	Uracil			Primin
	Uridine			Poncirin
	Uridine diphosphategalactose			p-Octopamine
	Geniposide			Pipermethystine
	Ipecoside			Pinobanksin
	(-)-Epiafzelechin			Pimelic acid
	4',5,7-Trimethoxyflavone			Pilocarpine
	7,8-Dihydroxyflavone			p-Hydroxymandelic acid
	Chrysoeriol 7-apiosylglucoside			Phosphorylcholine
	Cupressuflavone			Phosphoric acid
	Delphinidin			Phosphonoacetate
	Homoeriodictyol			Phenylacetyl-L-glutamine
	Hydrangenol			Perakine
	Isorhamnetin			p-Cresol
	Kaempferol			O-Phosphocholine
	Kazinol A			O-Acetylethanolamine
	Lonicerin			Nordihydroguaiaretic acid
	Meloside A			Nicotinic acid adenine dinucleotide;NAD
	Pelargonidin-3-O-glucoside			Nicotinamide
	Poncirin			N-hydroxy tryptamine
	Quercetin-7-O-beta-D-glucopyranoside			NG,NG-Dimethylarginine dihydrochloride
	Sakuranetin			N-Feruloyl putrescine
	Sciadopitysin			Neohesperidin
	Swertiajaponin			Neogrifolin;Grifolin;Ugaxanthone
	Trifolirhizin			Neocnidilide
	1,2,5,6-Tetrahydro-4H-pyrrolo[3,2,1-ij]quinolin-4-one			N-Acetyl-L-histidine
	Astragalin			N-Acetyl-L-glutamate 5-semialdehyde
	Fisetin			N6-isopentenyladenosine
	Narcissoside			N6-Acetyl-L-lysine
	Rutin			N1-Methyl-4-pyridone-3-carboxamide
	Spinosin			N1-Methyl-2-pyridone-5-carboxamide
	Tectorigenin			N1-(alpha-D-ribosyl)-5,6-dimethyl-benzimidazole
	Vitexin			N,N-Dimethyl-1,4-phenylenediamine
	(+)-Lyoniresinol 9'-O-glucoside			Muramic acid
	Anwulignan			Morroniside
	Schisantherin B			Moracin C
	Arctiin			Mevastatin
	Adenosine 2',3'-cyclic phosphate			Methyl jasmonate
	Vidarabine			Methyl cinnamate
	Primin			Methyl caffeate acid
	3-Nitro-L-tyrosine			Meloside A
	Erythritol			Matrine
	Ethyl caproate			Lupanine
	Homodihydrocapsaicin I			Lucidadiol
	Panaxynol			L-Threonine
	Torachrysone 8-O-glucoside			L-Quebrachitol
	Deethylatrazine			L-Phenylalanine;D-(+)-Phenylalanine;DL-Phenylalanine
	Cycloeucalenol			Lonicerin
	Limonexic acid			L-Lysine;L-Glutamine
	Lupeol			Lincomycin
	Serotonin			L-Homoserine
	8-Azabicyclo-3.2.1-octan-3-ol			L-Homoglutamic acid
	Ajmaline			L-Glutamic acid
	Astrocasine			Leukoaminochrome
	Calystegine A7			L-Citruline;L-Citrulline
	Coclaurine			Lathosterol
	Crotonoside			L-Asparagine
	D-Aspartic acid			Lancerin
	Ecgonine			Lactulose
	Ergocristine			Kojibiose
	Grossamide			Kirenol
	Huperzine B			Kakuol
	Hypaphorine			Kaempferol-3-O-rutinoside
	Lumichrome			Isoxanthopterin
	Nemorensine			Isosakuranetin
	Nicotinamide			Isoquercitrin
	Riddelline			Inosine
	Sipeimine			Indole-3-carboxaldehyde
	Symlandine;Symphytine			Indaconitine
	Trigonelline			Hypotaurine
	Tussilagine			Hyodeoxycholic acid
	Vasicine			Hygromycin B
	Isoquinoline;Quinoline			Hydroxysafflor yellow A
	Biliverdin			Hydrangenol
	D-Proline			Huperzine B
	N-Acetyl-L-glutamate 5-semialdehyde			Hinokiflavone
	Proline betaine			Hesperetin
	Pyridoxine			Harmaline
	Riboflavine			Guggulsterone E&Z
	3,4-Dihydrocoumarin			Guanosine
	4-Methylumbelliferyl acetate			Guanine
	7-Ethoxycoumarin			Grossamide
	Decursin			Glycitin
	Lansiumarin A			Glycitein
	Neoglycyrol			Glucose 1-phosphate
	Notopterol			Gentioflavin
	Nicotinic acid			Genistin;Genistein 7-O-Glucoside (Genistin)
	2-Hydroxyxanthone			Ganoderic acid H
	Garcinone D			Galactinol
	Norlichexanthone			Ferulic acid; Trans-Ferulic acid;trans-Ferulic acid
	Cajanol			Ethyl trans-p-methoxycinnamate
	Leukoaminochrome			Estriol 3-sulfate 16-glucuronide
	Betaine aldehyde			Esculin
	Sphingosine			Ephedrine
	Aminomalonic acid			D-Proline
	Phosphoric acid			DL-Benzylsuccinic acid
	3-Dehydrosphinganine			Dihydromyricetin
	4-O-alpha-D-Galactopyranuronosyl-D-galacturonic acid			Dihydrokavain
	Beta-D-Fructose 2-phosphate			Dihydroconiferyl alcohol
	Estriol 3-sulfate 16-glucuronide			Diallyl disulfide
	Hygromycin B			D-Glutamine
	Mannose 6-phosphate			Desoxypeganine
	Muramic acid			Deoxylapachol
	alpha-Irone			Deoxycorticosterone
	beta-Ionone			Denudatine
	Cyperotundone			Delphinidin-3-O-glucoside;Isoquercitrin
	Lutein			Deethylatrazine
	Ponasterone A			Decursin;5-Geranoxy-7-methoxycoumarin;Decursinol angelate
	17-Hydroxyprogesterone			D-alpha-Aminobutyric acid
	7-Oxo-beta-sitosterol			Cytidine
	Androstanediol			CYS-GLY;Cysteinylglycine
	Levonorgestrel			Cynaroside
	Physalin D			Cynarin;1,5-Dicaffeoylquinic acid
	(13E)-11a-Hydroxy-9,15-dioxoprost-13-enoic acid			C-Veratroylglycol
	12(13)-EpOME			Curcumin
	16(R)-HETE			Crotonoside
	5(S)-HPETE			Corydaline
	5,6-DHET			Cordycepin
	Palmitic acid			Coniferyl alcohol
	3-Indolebutyric acid			Colneleate
	DL-Dihydrozeatin			cis-Aconitic acid
				Cinnamyl cinnamate
				Cinchonine
				Chrysoeriol 7-apiosylglucoside
				Chlorogenic acid
				Cathinone
				Carbendazim
				Canthaxanthin
				Cannabinol
				Campesterol
				Calystegine A7
				Cajanol
				Caffeic acid
				Butyl 4-Hydroxybenzoate
				Biliverdin
				beta-Nicotinamide mononucleotide
				Beta-D-Glucose;alpha-D-Glucose
				Beta-D-Fructose 2-phosphate
				Bergamotine
				Benzyl acetate
				Astaxanthin
				Asp-Phe methyl ester;Aspartame
				Ascorbic acid
				Artemisinin
				Anthranilic acid
				alpha-Zearalenol;beta-Zearalenol
				alpha-Irone
				Alloimperatorin
				Alliin
				Alantolactone
				Agrocybenine
				Adenosine 5'-monophosphate
				Adenosine 3'-monophosphate
				Adenine
				Acetylcholine chloride
				9-Riburonosyladenine
				9-OxoODE
				9-Hydroxycalabaxanthone
				7-Methylguanine
				7-Hydroxyflavone
				6-Methoxymellein
				6-Hydroxykaempferol
				6-Gingerol; 6-Gingerol;[6]-Gingerol;Gingerol
				5'-S-Methyl-5'-thioadenosine
				5-oxoproline
				5-O-Caffeoylshikimic acid
				5-Hydroxyconiferaldehyde
				5'-Deoxyadenosine
				5,6-DHET
				5-(3-Pyridyl)-2-hydroxytetrahydrofuran
				4'-Prenyloxyresveratrol
				4-Methylumbelliferone
				4-Methyl-5-thiazoleethanol
				4-Methoxycinnamaldehyde
				4-Hydroxyphenylacetylglutamic acid
				4-Hydroxybenzaldehyde
				4-Hydroxy-3-methoxymandelate;Vanillylmandelic acid
				3-Methylindole
				Isoferulic acid
				3-Ethoxy-4-hydroxybenzaldehyde;Ethyl salicylate
				3,8'-Biapigenin
				3,4-Dihydroxybenzaldehyde;Protocatechuic aldehyde; 3,4-Dihydroxybenzaldehyde
				3-(2,3-Dihydroxyphenyl)propanoate
				2-Picolinic acid
				2-Phenylacetamide
				2-Keto-6-acetamidocaproate
				2-Hydroxyxanthone
				2'-Hydroxygenistein
				2-Hydroxyethanesulfonate
				2-Hydroxybutanoic acid
				2-Hydroxy-6-oxo-6-(2-carboxyphenyl)-hexa-2,4-dienoate
				2-Hydroxy-3-methylbenzalpyruvate
				2-Benzal-4-hydroxyacetophenone
				2,6-Dimethyl-7-octene-2,3,6-triol
				2,3-Dihydro-2-phenyl-4H-benzopyran-4-one
				1-Naphthol
				1-Methyladenine
				1-Isomangostin hydrate
				1H-Indole-2,3-dione
				1-Caffeoylquinic acid
				16(R)-HETE
				13(S)-HPOT
				12-OPDA
				11b-Hydroxyandrost-4-ene-3,17-dione
				1,2-Dimethoxybenzene
				(S)-2-Acetolactate
				(13E)-11a-Hydroxy-9,15-dioxoprost-13-enoic acid
				(-)-Epiafzelechin
				(-)-Cinchonidine
